# Supplementary material
Source: Springer Nature journal article supplement (https://www.springermedizin.de/resource/supplementary/12878_2011_60_MOESM1_ESM.pdf/9441648)

# Liver Enzymes

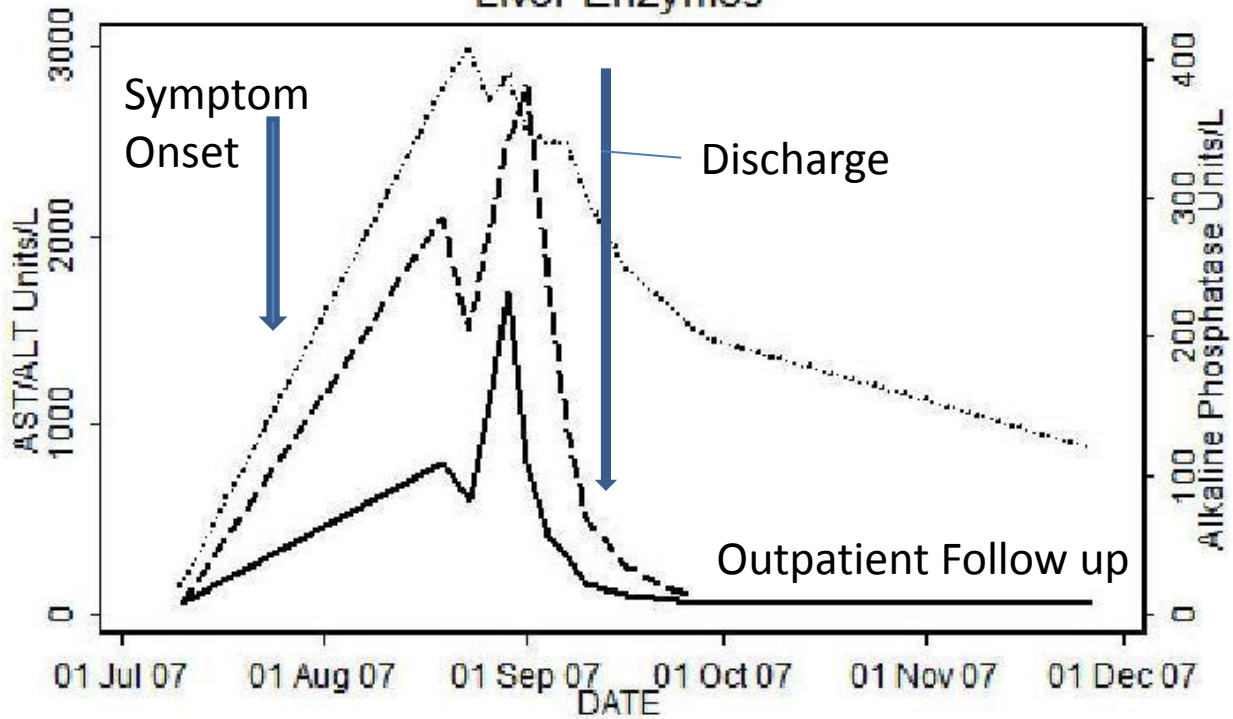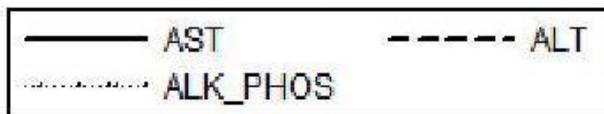

Supplement: MOESM1 [file 9441648]
